# Supplementary material
Source: PubMed Central journal article supplement (PMC2846703)
Supplement: NIHMS185559-supplement-supplement_1.pdf [file NIHMS185559-supplement-supplement_1.pdf]

**Supplementary Table S1.**  $^1D_{\text{HN}}$  values of the imino groups of native *E. coli* tRNA<sup>Val</sup> obtained from different external alignment media

| Assignment                  | External Alignment Media |                                                       |                 |                 |                 |               |
|-----------------------------|--------------------------|-------------------------------------------------------|-----------------|-----------------|-----------------|---------------|
|                             | Pf1 <sup>a</sup>         | C <sub>8</sub> E <sub>5</sub> /1-octanol <sup>b</sup> | fd              | fd-9ah8         | DMPC/DHPC       | DMPC/DHPC/SDS |
| G1                          | -12.2                    | -11.3                                                 | -3.0            | -3.9            | -19.2           | -1.7          |
| G2                          | 6.5                      | 10.0                                                  | 2.4             | 3.0             | ND <sup>c</sup> | 0.6           |
| G3                          | 9.8                      | 14.2                                                  | 4.2             | 4.3             | ND <sup>c</sup> | 1.2           |
| U4                          | 4.6                      | 4.0                                                   | 1.5             | 2.8             | 9.5             | -0.3          |
| G5                          | -21.2                    | -24.2                                                 | -2.4            | -4.9            | -60.7           | -3.6          |
| U7                          | -6.5                     | -5.0                                                  | -1.2            | -2.5            | ND <sup>c</sup> | -2.5          |
| s <sup>4</sup> U8           | -0.8                     | -1.0                                                  | 0.5             | -0.6            | -3.7            | 0.0           |
| G10                         | -12.9                    | -20.9                                                 | ND <sup>c</sup> | ND <sup>c</sup> | ND <sup>c</sup> | 3.6           |
| U12                         | 1.0                      | -3.7                                                  | -0.3            | -0.5            | -7.5            | -0.6          |
| G15                         | -23.6                    | -31.0                                                 | -3.6            | -5.9            | -49.4           | -3.4          |
| G18                         | -16.6                    | -18.6                                                 | -4.4            | -6.9            | ND <sup>c</sup> | -3.7          |
| G22                         | -7.5                     | -8.5                                                  | -0.4            | -1.0            | -23.6           | -1.3          |
| G24                         | -8.4                     | -11.4                                                 | -1.6            | -2.7            | -25.6           | -2.4          |
| U29                         | -20.1                    | -26.5                                                 | -2.0            | -4.4            | -54.9           | -3.4          |
| G39                         | -15.3                    | -16.6                                                 | -2.9            | -5.3            | -36.7           | -3.8          |
| G40                         | -24.4                    | -30.7                                                 | -4.9            | -9.0            | ND <sup>c</sup> | -2.5          |
| G42                         | -5.7                     | -9.9                                                  | -1.5            | -2.4            | -16.4           | -0.8          |
| m <sup>7</sup> G46          | -23.6                    | -25.0                                                 | -7.9            | -10.7           | ND <sup>c</sup> | -4.9          |
| G49                         | 25.1                     | 28.1                                                  | 5.8             | 9.2             | ND <sup>c</sup> | 3.6           |
| G50                         | 17.9                     | 25.3                                                  | 1.8             | 5.0             | ND <sup>c</sup> | 1.0           |
| G52                         | -25.3                    | -23.8                                                 | -4.7            | -8.4            | ND <sup>c</sup> | -3.9          |
| G53                         | 5.5                      | 0.1                                                   | 1.3             | 3.7             | ND <sup>c</sup> | -0.6          |
| T54                         | 4.1                      | 7.6                                                   | 1.1             | 1.7             | 16.4            | 2.1           |
| Ψ55(N3)                     | 14.9                     | 20.9                                                  | 4.8             | 6.8             | 42.7            | 2.4           |
| G63                         | 0.3                      | 3.0                                                   | -3.9            | -3.7            | ND <sup>c</sup> | -0.3          |
| U64                         | 20.6                     | 30.1                                                  | 4.6             | 7.6             | ND <sup>c</sup> | 2.7           |
| U67                         | -17.5                    | -19.9                                                 | -3.5            | -5.8            | -48.1           | -3.0          |
| R <sub>p</sub> <sup>d</sup> |                          | 0.98                                                  | 0.91            | 0.96            | 0.98            | 0.83          |

<sup>a</sup>  $^1D_{\text{HN}}$  values from (Mollova, et al. 2000).

<sup>b</sup>  $^1D_{\text{HN}}$  values from (Vermeulen, et al. 2005).

<sup>c</sup>  $^1D_{\text{HN}}$  values not determined.

<sup>d</sup> Pearson's correlation coefficient between  $^1D_{\text{HN}}$  values from each of the different alignment media and Pf1.

**Supplementary Table S2.**  $^1J_{\text{HN}}(\text{B}_0)$  and MSA-induced  $^1D_{\text{HN}}(\text{B}_0)$  values for the imino groups of native E. coli tRNA<sup>Val</sup>

| Assignment              | $^1J_{\text{HN}}(\text{B}_0)^a$ |                        |                        |                        |                      | $^1D_{\text{HN}}(\text{B}_0)^c$ |                        |                            |
|-------------------------|---------------------------------|------------------------|------------------------|------------------------|----------------------|---------------------------------|------------------------|----------------------------|
|                         | $^1J_{\text{HN}}(500)$          | $^1J_{\text{HN}}(600)$ | $^1J_{\text{HN}}(800)$ | $^1J_{\text{HN}}(900)$ | $^1J_{\text{HN}}(0)$ | $^1D_{\text{HN}}(800)$          | $^1D_{\text{HN}}(900)$ | $^1D_{\text{HN}}(800,900)$ |
| G1                      | -87.63                          | -88.46                 | -86.59                 | -85.46                 | -88.91               | -2.32                           | -3.45                  | -2.53                      |
| G2                      | -88.33                          | -88.89                 | -88.16                 | -87.87                 | -88.72               | -0.56                           | -0.85                  | -0.37                      |
| G3                      | -89.14                          | -89.96                 | -89.39                 | -89.66                 | -89.18               | 0.22                            | 0.48                   | 1.01                       |
| U4                      | -87.47                          | -86.73                 | -87.94                 | -88.94                 | -86.60               | 1.33                            | 2.33                   | 1.37                       |
| G5                      | -87.78                          | -88.41                 | -87.37                 | -86.20                 | -88.63               | -1.27                           | -2.43                  | -1.84                      |
| U7                      | -87.68                          | -86.88                 | -86.59                 | -86.03                 | -88.24               | -1.65                           | -2.21                  | -1.69                      |
| s <sup>4</sup> U8       | ND <sup>d</sup>                 |                        |                        |                        |                      |                                 |                        |                            |
| G10                     | -88.83                          | -89.28                 | -88.76                 | -87.94                 | -89.30               | -0.54                           | -1.36                  | -0.36                      |
| U12                     | -87.20                          | -86.34                 | -87.07                 | -87.60                 | -86.80               | 0.27                            | 0.81                   | 0.51                       |
| G15                     | -88.81                          | -88.72                 | -87.45                 | -85.72                 | -90.16               | -2.72                           | -4.44                  | -2.46                      |
| G18                     | ND <sup>d</sup>                 |                        |                        |                        |                      |                                 |                        |                            |
| G22                     | -88.37                          | -89.08                 | -89.00                 | -88.84                 | -88.29               | 0.71                            | 0.54                   | 0.86                       |
| G24                     | -87.03                          | -87.38                 | -85.63                 | -84.53                 | -88.36               | -2.73                           | -3.83                  | -2.20                      |
| U29                     | -85.89                          | -84.56                 | -84.59                 | -85.29                 | -85.96               | -1.38                           | -0.67                  | -1.29                      |
| G39                     | -87.45                          | -86.97                 | -86.44                 | -85.82                 | -88.09               | -1.65                           | -2.27                  | -1.78                      |
| G40                     | -87.27                          | -87.51                 | -86.03                 | -84.61                 | -88.57               | -2.53                           | -3.96                  | -2.84                      |
| G42                     | -86.65                          | -87.29                 | -86.94                 | -86.44                 | -86.87               | 0.07                            | -0.43                  | -0.49                      |
| m <sup>7</sup> G46      | -86.22                          | -85.53                 | -83.87                 | -82.93                 | -87.69               | -3.82                           | -4.76                  | -3.62                      |
| G49                     | -88.99                          | -89.37                 | -89.16                 | -88.92                 | -89.10               | 0.06                            | -0.19                  | 0.11                       |
| G50                     | -89.59                          | -90.85                 | -90.67                 | -90.70                 | -89.37               | 1.30                            | 1.32                   | 1.07                       |
| G52                     | -86.85                          | -87.22                 | -85.95                 | -83.99                 | -88.17               | -2.22                           | -4.18                  | -2.92                      |
| G53                     | -87.87                          | -84.67                 | -86.38                 | -86.43                 | -87.64               | -1.26                           | -1.21                  | -1.18                      |
| T54                     | -87.41                          | -86.49                 | -86.75                 | -87.01                 | -87.40               | -0.66                           | -0.39                  | -0.26                      |
| Ψ55(N3)                 | -91.53                          | -91.70                 | -92.58                 | -92.34                 | -91.05               | 1.54                            | 1.29                   | 1.28                       |
| G63                     | -87.66                          | -88.65                 | -88.32                 | -87.60                 | -87.84               | 0.48                            | -0.24                  | 0.08                       |
| U64                     | -89.78                          | -89.48                 | -90.17                 | -91.79                 | -88.90               | 1.27                            | 2.88                   | 1.76                       |
| U67                     | -84.53                          | -83.60                 | -83.59                 | -83.36                 | -84.84               | -1.25                           | -1.48                  | -1.76                      |
| Standard deviation (Hz) | 0.30 <sup>b</sup>               | 0.72 <sup>b</sup>      | 0.31 <sup>b</sup>      | 0.83 <sup>b</sup>      | 1.15 <sup>f</sup>    | 1.19 <sup>g</sup>               | 1.42 <sup>g</sup>      | 1.85 <sup>g</sup>          |

<sup>a</sup> One-bond imino group splittings determined at four magnetic field strengths. Reported values are the average of the two experimental methods described in Materials and Methods.

<sup>b</sup> Standard deviation between of the  $^1J_{\text{HN}}(\text{B}_0)$  values determined from two method (see Materials and Methods).

<sup>c</sup>  $^1D_{\text{HN}}(800)$  and  $^1D_{\text{HN}}(900)$  were determined by subtracting  $^1J_{\text{HN}}(0)$  from  $^1J_{\text{HN}}(800)$  and  $^1J_{\text{HN}}(900)$ , respectively.

<sup>d</sup> Values not determined.

<sup>f</sup> Standard deviation of  ${}^1J_{\text{HN}}(0)$  determined from weighted linear regression analysis.

<sup>g</sup> Error in  ${}^1D_{\text{HN}}(B_0)$  values calculated using standard error propagation analysis.
